# Supplementary material for: The solution characteristics of nitrated bacterial cellulose in acetone
Source: Royal Society of Chemistry journal article supplement (doi:10.1039/c8nj02018c), 2018-01-01
Supplement: c8nj02018c1.pdf [file c8nj02018c1.pdf]

## Supporting information

### The Solution Characteristics of Nitrated Bacterial Cellulose in Acetone

Qingping Luo<sup>a</sup>, Juan Zhu<sup>b</sup>, Zhaoqian Li<sup>a</sup>, Xiaohui Duan<sup>a</sup>, Chonghua Pei<sup>a</sup>, Changyong Mao<sup>b</sup>

a. State Key Laboratory Cultivation Base for Nonmetal Composites and Functional Materials,  
Southwest University of Science and Technology, Mianyang 621010, China.

b. Luzhou North Chemical Industries Co., Luzhou 646000, China.

\*CORRESPONDING AUTHOR FOOTNOTE

Prof. Q.P. LUO

State Key Laboratory Cultivation Base for Nonmetal Composites and Functional Materials,  
Southwest University of Science and Technology, Mianyang 621010, China.

E-mail: [luoqingping@swust.edu.cn](mailto:luoqingping@swust.edu.cn)

Tel: +86 351 2419280; fax: +86 351 2419280.

## Figures

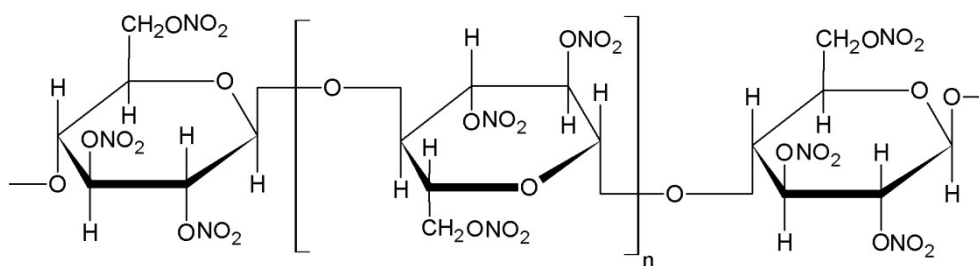

$$\text{Degree of substitution, DS} = \frac{3.6 \cdot \text{nitrogen content}[\%]}{31.13 - \text{nitrogen content}[\%]}$$

Cellulose mononitrate DS=1 (6.76% of nitrogen content)

Cellulose dinitrate DS=2 (11.11% of nitrogen content)

Cellulose trinitrate DS=3 (14.14% of nitrogen content)

Fig. S1. Chemical structure of NBC polymer and its degree of substitution (DS).

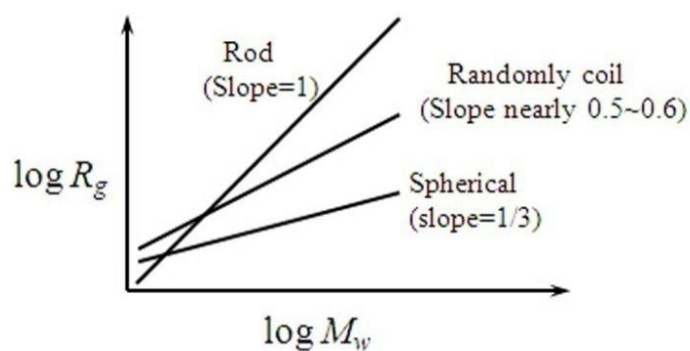

Fig. S2 The relationship between  $M_w$ ,  $R_g$  and the molecular shape.

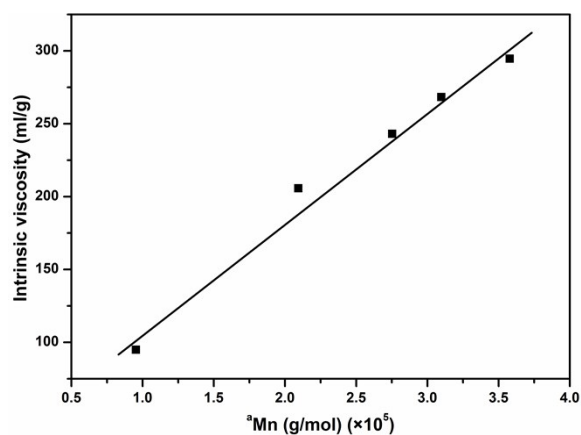

Fig. S3 The relationship curve between NBC's molecular weight and intrinsic viscosity

## Tables

Table S1 The degrees of substitution of NBC samples with different nitrogen contents.

|                        |       |       |       |       |       |
|------------------------|-------|-------|-------|-------|-------|
| Nitrogen content (%)   | 11.97 | 12.55 | 12.73 | 12.88 | 13.16 |
| Degree of substitution | 2.25  | 2.43  | 2.49  | 2.54  | 2.64  |
